# Supplementary material for: Active and regioselective rhodium catalyst supported on reduced graphene oxide for 1-hexene hydroformylation
Source: Royal Society of Chemistry journal article supplement (doi:10.1039/c5cy01355k), 2015-09-16
Supplement: c5cy01355k1.pdf [file c5cy01355k1.pdf]

## Electronic Supplementary Information (ESI)

### Active and Regioselective Rhodium Catalyst Supported on Reduced Graphene Oxide for 1-Hexene Hydroformylation

Minghui Tan,<sup>a,b</sup> Guohui Yang,<sup>b</sup> Tiejun Wang,<sup>d</sup> Tharapong Vitidsant,<sup>e</sup> Jie Li,<sup>b</sup> Qinghong Wei,<sup>b</sup> Peipei Ai,<sup>b</sup> Mingbo Wu,<sup>a\*</sup> Jingtang Zheng,<sup>a\*</sup> and Noritatsu Tsubaki<sup>b,c\*</sup>,

<sup>a</sup> State Key Laboratory of Heavy Oil Processing, China University of Petroleum, Qingdao 266580, PR China. E-mail: wumb@upc.edu.cn, jtzheng03@163.com

<sup>b</sup> Department of Applied Chemistry, School of Engineering, University of Toyama, Gofuku 3190, Toyama 930-8555, Japan. E-mail: tsubaki@eng.u-toyama.ac.jp. Phone: +(81)-76-445-6846. Fax: +(81)-76-445-6846.

<sup>c</sup> JST, CREST, Gobancho 7, Chiyoda-ku, Tokyo 102-0076, Japan

<sup>d</sup> CAS Key Laboratory of Renewable Energy, Guangzhou Institute of Energy Conversion, Chinese Academy of Sciences, 510640 Guangzhou, PR China

<sup>e</sup> Department of Chemical Technology, Faculty of Science, Chulalongkorn University, Bangkok 10330, Thailand

## Experimental Section

**Preparation of Graphite Oxide:** 10.0 g graphite powder and 5.0 g  $\text{NaNO}_3$  were mixed in a flask cooled in ice bath. 230 mL of concentrated  $\text{H}_2\text{SO}_4$  solution was added into the above mixture. After stirring for 10 min,  $\text{KMnO}_4$  was gradually and slowly added into the mixture and then the mixture was under stirring in the ice bath for another 15 min. The flask was put into a water bath at 35 °C and stirred for 50 min. Then, 460 mL of water was added into the above mixture evenly and slowly, and the temperature of water bath was quickly increased to 98 °C and stirred for another 30 min. Finally, 1000 mL of deionized water and moderate 30%  $\text{H}_2\text{O}_2$  were slowly added into the mixture and stirred for 5 min. The obtained mixture was immediately filtrated and the filter cake was washed by 10% HCl solution for several times to remove residual salt, and then washed by deionized water until the pH > 6. The collected solid was dried under vacuum at 50 °C for 48 h.

**Pre-treatment of AC and CNTs:** AC (40-60 meshes, Kanto Chemical Co. Inc., Japan) was heated in 35%  $\text{HNO}_3$  at 90 °C for 6 h. CNTs (inner diameter: 20–30 nm; length: 1–10  $\mu\text{m}$ ; Chengdu Organic Chemistry Co. Ltd., China) was heated in 65%  $\text{HNO}_3$  at 120 °C for 14 h. After being refluxed, the sample was washed with deionized water until pH=7, and then dried at 60 °C over 12 h.

**CO-TPD:** Sample was pretreated with Ar gas flow at 150 °C for 1 h. After temperature was cooled down to 40 °C, the gas was switched to CO for 30 min, and then pure He was introduced to purge for 30 min. The CO-TPD experiment was performed in He flow at a heating rate of 5 °C·min<sup>-1</sup>, where the desorbed CO was detected by a mass spectrometry.

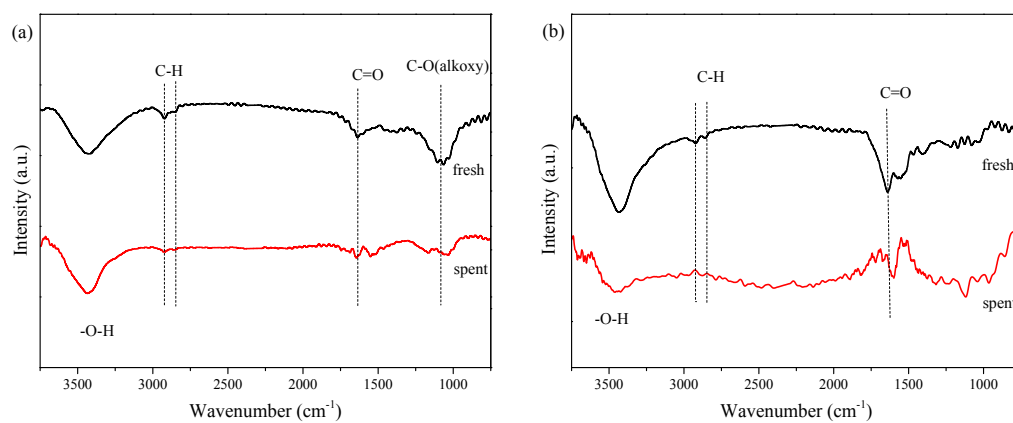

Figure S1 FTIR spectra of Rh/AC (a) and Rh/CNTs (b)

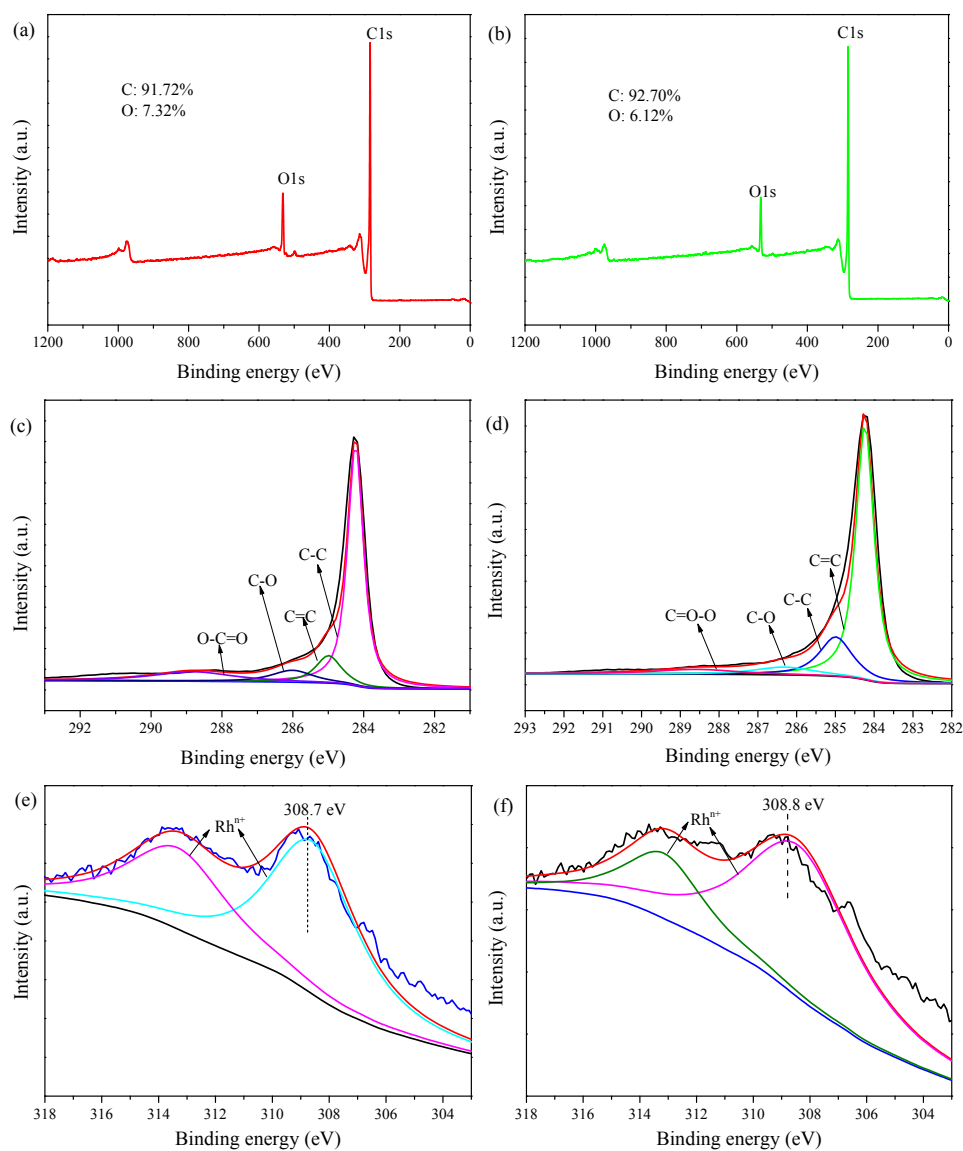

Figure S2 XPS spectra of fresh and spent Rh/CNTs: (a) survey spectra of fresh Rh/CNTs, (b) survey spectra of spent Rh/CNTs, (c) C1s of fresh Rh/CNTs, (d) C1s of spent Rh/CNTs, (e) Rh3d region XPS spectra of fresh Rh/CNTs, (f) Rh3d region XPS spectra of spent Rh/CNTs

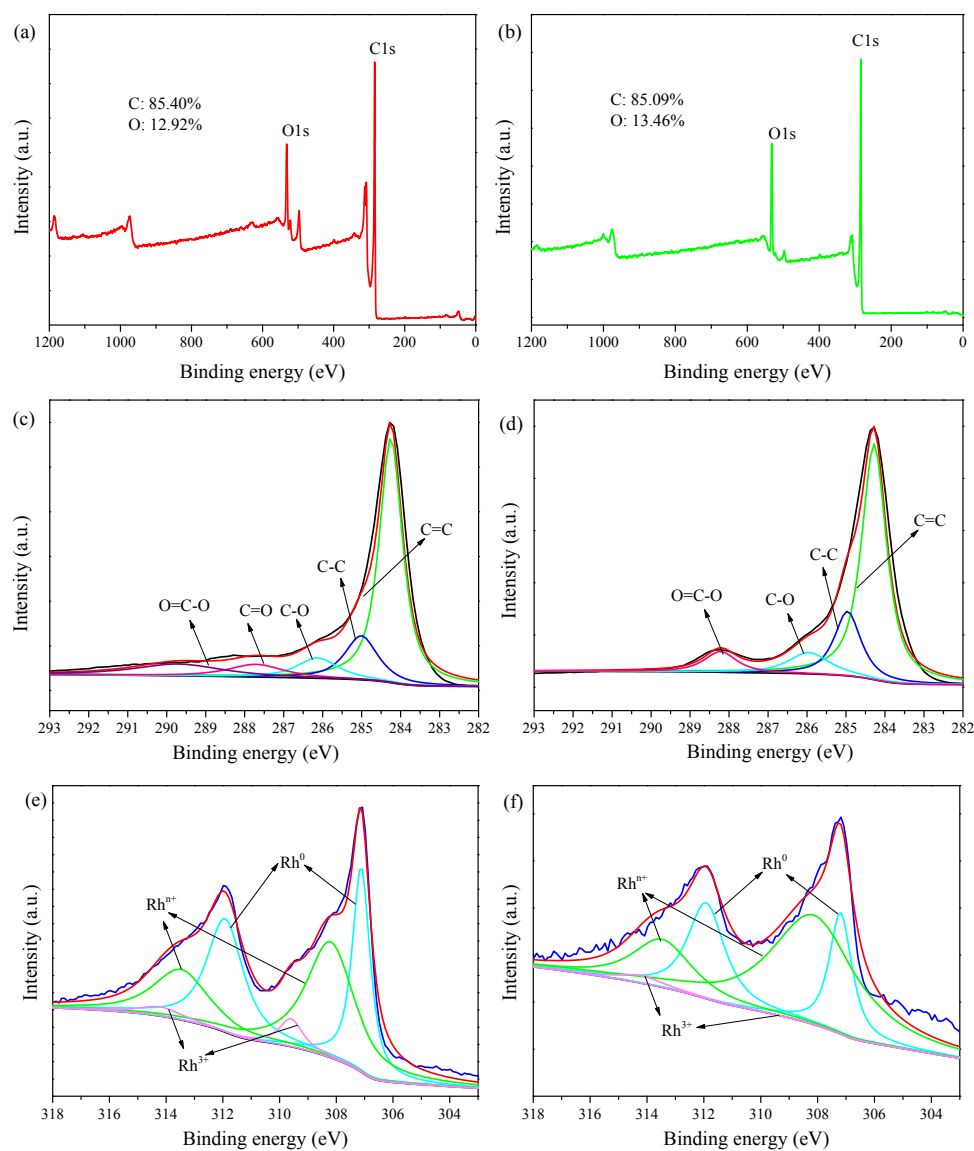

Figure S3 XPS spectra of fresh and spent Rh/AC: (a) survey spectra of fresh Rh/AC, (b) survey spectra of spent Rh/AC, (c) C1s of fresh Rh/AC, (d) C1s of spent Rh/AC, (e) Rh3d region XPS spectra of fresh Rh/AC, (f) Rh3d region XPS spectra of spent Rh/AC

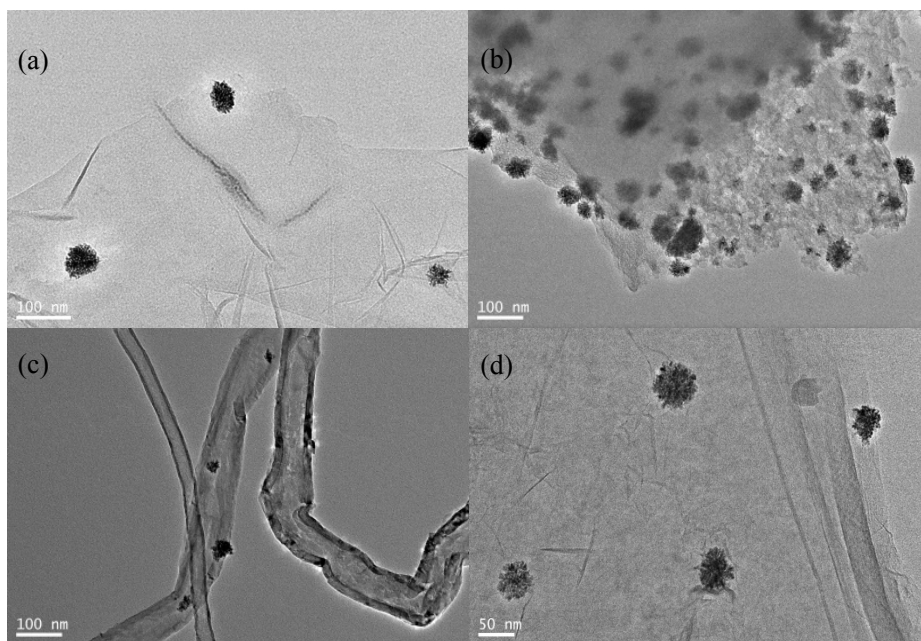

Figure S4 TEM images of Rh/RGO(a), Rh/AC(b), Rh/CNTs(c) and spent Rh/RGO(d)
